# Supplementary material for: Loss of bone morphogenetic protein-binding endothelial regulator causes insulin resistance
Source: PubMed Central journal article supplement (PMC7997910; doi:10.1038/s41467-021-22130-2), 2021-03-26
Supplement: 41467_2021_22130_MOESM1_ESM.pdf [file 41467_2021_22130_MOESM1_ESM.pdf]

**Supplementary Table 1. Mass spectrometry result shows representative proteins that potentially form complex with BMPER.**

| Gene ID | GeneSymbol | SRA | PSMs | iBAQ |
|---------|------------|-----|------|------|
| 3939    | LDHA       | S   | 118  | 0.38 |
| 4000    | LMNA       | S   | 100  | 0.17 |
| 8514    | KCNAB2     | S   | 49.2 | 0.12 |
| 4864    | NPC1       | S   | 19.2 | 0.05 |
| 54887   | UHRF1BP1   | S   | 13.5 | 0.02 |

S: high confidence

PSMs: total normalized peptide hits

iBAQ: total abundance of the gene

**Supplementary Table 2. Metabolic parameters.**

| Parameters                    | CC           |                              | HFD          |                                 | db/db        |                                |
|-------------------------------|--------------|------------------------------|--------------|---------------------------------|--------------|--------------------------------|
|                               | GFP          | BMPER                        | GFP          | BMPER                           | GFP          | BMPER                          |
| <b><u>Liver</u></b>           |              |                              |              |                                 |              |                                |
| TG                            | 8.44 ± 0.38  | 7.34 ± 0.91 <sup>(NS)</sup>  | 19.63 ± 0.26 | 13.98 ± 1.40 <sup>P=0.001</sup> | 22.99 ± 1.90 | 18.88 ± 0.63 <sup>P=0.04</sup> |
| DAG                           | 2.98 ± 0.16  | 3.14 ± 0.16 <sup>(NS)</sup>  | 5.09 ± 0.27  | 3.11 ± 0.30 <sup>P=0.002</sup>  | 5.40 ± 0.29  | 3.28 ± 0.33 <sup>P=0.001</sup> |
| BCAA                          | 0.50 ± 0.05  | 0.51 ± 0.05 <sup>(NS)</sup>  | 0.64 ± 0.03  | 0.50 ± 0.09 <sup>(NS)</sup>     | 0.63 ± 0.06  | 0.52 ± 0.05 <sup>(NS)</sup>    |
| Ceramide                      | 0.16 ± 0.002 | 0.17 ± 0.002 <sup>(NS)</sup> | 0.12 ± 0.001 | 0.12 ± 0.001 <sup>(NS)</sup>    | 0.12 ± 0.002 | 0.11 ± 0.002 <sup>(NS)</sup>   |
| <b><u>Skeletal muscle</u></b> |              |                              |              |                                 |              |                                |
| TG                            | 4.88 ± 0.56  | 4.13 ± 0.63 <sup>(NS)</sup>  | 9.21 ± 0.59  | 10.08 ± 0.50 <sup>(NS)</sup>    | 10.33 ± 0.34 | 10.65 ± 0.12 <sup>(NS)</sup>   |
| DAG                           | 0.50 ± 0.07  | 0.54 ± 0.06 <sup>(NS)</sup>  | 0.88 ± 0.06  | 0.68 ± 0.08 <sup>(NS)</sup>     | 1.31 ± 0.07  | 0.71 ± 0.11 <sup>P=0.002</sup> |
| BCAA                          | 0.27 ± 0.03  | 0.24 ± 0.04 <sup>(NS)</sup>  | 0.41 ± 0.07  | 0.37 ± 0.04 <sup>(NS)</sup>     | 0.58 ± 0.08  | 0.48 ± 0.05 <sup>(NS)</sup>    |
| Ceramide                      | 0.08 ± 0.001 | 0.08 ± 0.001 <sup>(NS)</sup> | 0.11 ± 0.002 | 0.11 ± 0.002 <sup>(NS)</sup>    | 0.11 ± 0.002 | 0.11 ± 0.002 <sup>(NS)</sup>   |

n=8 mice (**Liver**, CC or HFD; **Skeletal muscle**, CC or HFD), 5 mice (**liver**, db/db, GFP; **Skeletal muscle**, db/db, GFP), 7 mice (**liver**, db/db, BMPER; **Skeletal muscle**, db/db, BMPER). Data are presented as mean values ± SEM. NS, not significant. Units are mg/g tissue for TG and nmol/mg tissue for DAG, BCAA (Leucine, Isoleucine and Valine) and ceramide. Analysis was unpaired two-tailed Student's *t*-test.

**Supplementary Table 3. Main reagent table.**

| <b>REAGENT or RESOURCE</b>                           | <b>SOURCE</b>  | <b>IDENTIFIER</b> |
|------------------------------------------------------|----------------|-------------------|
| <b>Antibodies</b>                                    |                |                   |
| LRP1-CTD                                             | Sigma          | Cat#L2170         |
| BMPER (Crossveinless-2/CV-2)                         | R&D Systems    | Cat# AF2299       |
| NPC1                                                 | Abcam          | Cat# 124801       |
| IRS-1                                                | Cell signaling | Cat#2382          |
| phospho- IRS1 (Tyr612)                               | Millipore      | Cat#09-432        |
| Akt                                                  | Cell signaling | Cat#9272          |
| phospho-Akt (Ser473)                                 | Cell signaling | Cat#9271          |
| phospho-Akt (Thr308) (D25E6)                         | Cell signaling | Cat#13038         |
| Insulin Receptor $\beta$ (4B8)                       | Cell signaling | Cat#3025          |
| $\beta$ -Actin (C4) -HRP                             | Santa Cruz     | Cat#sc-47778      |
| Smad1                                                | Cell signaling | Cat#9743          |
| phospho- Smad1/Smad5/Smad8 (Ser463/465)              | EMD Millipore  | Cat#AB3848-I      |
| Flag antibody                                        | Sigma-Aldrich  | Cat#2426          |
| EZview Red ANTI-FLAG M2 Affinity Gel                 | Sigma-Aldrich  | Cat#F2426         |
| <b>Chemicals, Peptides, and Recombinant Proteins</b> |                |                   |
| 60% high-fat diet (HFD)                              | Research Diets | Cat#D12492        |
| Insulin                                              | Novolin R      | Cat#0169-1833-11  |
| Mouse BMPER (Crossveinless-2) Protein                | R&D Systems    | Cat#2299-CV-050   |
| Recombinant BMP2 protein                             | R&D Systems    | Cat#355-BM/CF     |

|                                   |                      |                   |
|-----------------------------------|----------------------|-------------------|
| Recombinant BMP2 protein          | R&D Systems          | Cat# 5020-BP-010  |
| Advanced glycation endproduct-BSA | Sigma-Aldrich        | Cat#121800-10MG-M |
| Palmitic acid                     | Sigma-Aldrich        | Cat#P0500         |
| Protein A/G Plus-agarose beads    | Santa Cruz           | Cat#sc-2003       |
| iScript™ cDNA synthesis kit       | Bio-Rad Laboratories | Cat#1708891       |
| iTaq SYBR Green supermix          | Bio-Rad Laboratories | Cat#1725121       |
| TaqMan™ Universal PCR Master Mix  | Thermo Scientific    | Cat#4304437       |
| Insulin solution                  | Santa Cruz           | Cat# 11061-68-0   |
| Cell maintenance supplements      | Gibco                | Cat# A15564       |
| Tamoxifen                         | Sigma-Aldrich        | Cat#T5648         |
| Lipofectamine 2000                | Thermo Scientific    | Cat#11668019      |
| Perfusion Medium                  | Thermo Scientific    | Cat#17701038      |
| Collagenase                       | Sigma-Aldrich        | Cat#C5168         |
| DMEM                              | Thermo Scientific    | Cat#11965118      |
| William's E Medium                | Thermo Scientific    | Cat#12551-032     |
| Immobilon-P transfer membrane     | Millipore            | IPVH00010         |
| Wash Medium                       | Thermo Scientific    | Cat#17704-024     |
| Percoll                           | GE Healthcare        | Cat#17089101      |
| OptiPrep density gradient medium  | Sigma-Aldrich        | Cat#1556          |
| Penicillin & Streptomycin         | Thermo Scientific    | Cat#15140122      |
| Fetal bovine serum (FBS)          | Sigma-Aldrich        | Cat#F0926         |
| Horse serum                       | Thermo Scientific    | Cat#16050114      |
| Maintenance supplements           | Thermo Scientific    | Cat#CM4000        |
| Chlorpromazine (CPM)              | Sigma-Aldrich        | Cat#C8138         |
| Methyl-β-cyclodextrin (MCD)       | Sigma-Aldrich        | Cat#M7439         |

| <b>Critical Commercial Assays</b>                                      |                                                                                      |                |
|------------------------------------------------------------------------|--------------------------------------------------------------------------------------|----------------|
| Insulin ELISA kit                                                      | Millipore                                                                            | Cat#EZRMI-13K  |
| RNA purification kit                                                   | QIAGEN                                                                               | Cat#74104      |
| Infinity Glucose kit                                                   | Thermo Scientific                                                                    | Cat#TR15421    |
| Albumin ELISA kit                                                      | Abcam                                                                                | Cat#ab108792   |
| Triglycerides reagent                                                  | Thermo Scientific                                                                    | Cat#TR22421    |
| DAG assay kit                                                          | Cell Biolabs                                                                         | Cat#MET5028    |
| BCAA assay kit                                                         | Cell Biolabs                                                                         | Cat#MET5056    |
| Ceramide ELISA kit                                                     | MyBiosource                                                                          | Cat#MBS7255958 |
| <b>Experimental Models: Cell Lines</b>                                 |                                                                                      |                |
| Primary hepatocytes                                                    | This paper                                                                           | N/A            |
| HEK293 cells                                                           | ATCC                                                                                 | Cat#CRL-1573   |
| Mouse embryonic fibroblasts                                            | ATCC                                                                                 | Cat#SCRC-1008  |
| Mouse heart endothelial cells                                          | Cell Biologics                                                                       | Cat#C57-6024   |
| Mouse lung endothelial cells                                           | Cell Biologics                                                                       | Cat#C57-6011   |
| Mouse liver endothelial cells                                          | Cell Biologics                                                                       | Cat#C57-6017   |
| <b>Experimental Models: Organisms/Strains</b>                          |                                                                                      |                |
| Mouse: B6.Cg-Tg (CAG-cre/ Esr1*)<br>5Amc/J (CAG-CreER <sup>+/-</sup> ) | Jackson Laboratories                                                                 | JAX: 004682    |
| Mouse: Cdh5(PAC)-CreERT2 (Cdh5-<br>CreER <sup>+/-</sup> )              | Dr. Ralf H. Adams from Max<br>Planck Institute for Molecular<br>Biomedicine, Germany | N/A            |
| Mouse: C57BL/6                                                         | Jackson Laboratories                                                                 | JAX: 000664    |
| Mouse: IR <sup>flox</sup>                                              | Jackson Laboratories                                                                 | JAX: 006955    |
| Mouse: B6 db                                                           | Jackson Laboratories                                                                 | JAX: 000697    |
| <b>Recombinant DNA</b>                                                 |                                                                                      |                |
| Npc1 mouse shRNA plasmid                                               | Origene                                                                              | Cat#TL501501   |

|                          |                |              |
|--------------------------|----------------|--------------|
| Npc2 mouse shRNA plasmid | Origene        | Cat#TL504048 |
| pCMV-Tag2 vector         | Agilent        | Cat#211172   |
| Scrambled shRNA plasmid  | OriGene        | Cat#TR30021  |
| pLenti-C-Flag-DDK-BMPER  | This paper     | N/A          |
| Ad-CMV-iCre              | Vector Biolabs | Cat#1045     |

**Supplementary Table 4. Sequence information for qPCR primers.**

| <b>Gene</b>    | <b>Forward primer</b>            | <b>Reverse primer</b>           |
|----------------|----------------------------------|---------------------------------|
| G6Pase         | 5'- tctgtcccggatctaccttg-3'      | 5'- gaaagtttcagccacagcaa-3'     |
| PEPCK          | 5'- ggagtaccattgagggtatcat-3'    | 5'- gctgagggtctcatagacaag-3'    |
| GK             | 5'- cagatgctggatgacagagc-3'      | 5'- gccaggatctgctctaccttt-3'    |
| SREBP1         | 5'- acaagattgtggagctcaaagac-3'   | 5'- tgcgcaagacagcagattta-3'     |
| IL1 $\beta$    | 5'- agttgacggaccccaaaag-3'       | 5'- agctggatgctctcatcagg-3'     |
| IL6            | 5'- gctaccaaactggatataatcagga-3' | 5'- ccaggtagctatggtactccagaa-3' |
| TNF $\alpha$   | 5'- ctgtagcccacgtcgtagc-3'       | 5'- ttgagatccatgccgttg-3'       |
| $\beta$ -Actin | 5'- ccaaccgtgaaaagatgacc-3'      | 5'- accagaggcatacagggaca-3'     |
| BMPER          | 5'- ggctgagccatgtgtcct-3'        | 5'- cgcacctcagactctgtcac-3'     |
| BMP2           | 5'- agatctgtaccgcaggaact-3'      | 5'- gttcctccacggcttcttc-3'      |
| BMP4           | 5'- gatctttaccggctccagtct-3'     | 5'- tgggatgttctccagatgttc-3'    |
| BMP6           | 5'- actgactagcgcgcagga-3'        | 5'- tgtggggagaactccttgc-3'      |
| BMP7           | 5'- cgagacctccagatcacagt-3'      | 5'- cagcaagaagaggtccgact-3'     |
| BMP9           | 5'- ggaagctgtgggtagatgacc-3'     | 5'- caagtgggtgggatgat-3'        |
| BMPR2          | 5'- gagccctcccttgacctg-3'        | 5'- gtatcgacccctccaatc-3'       |

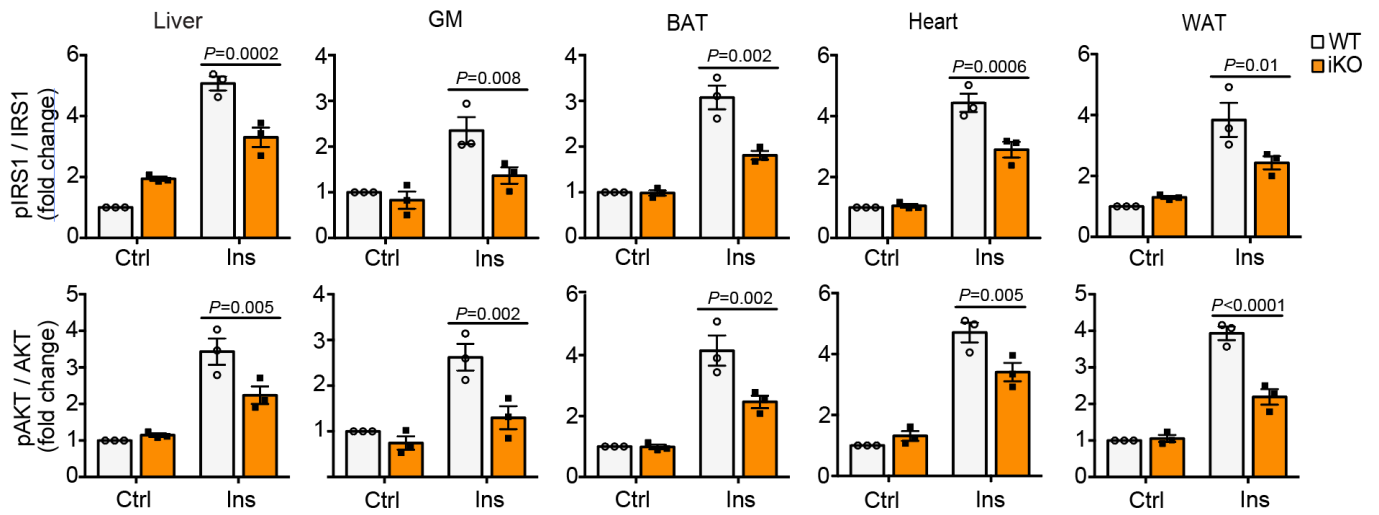

**Supplementary Figure 1. Quantification for Figure 1I.** n=3 mice. Data are presented as mean values  $\pm$  SEM. Analysis was two-way ANOVA followed by Fisher's LSD multiple comparison test.



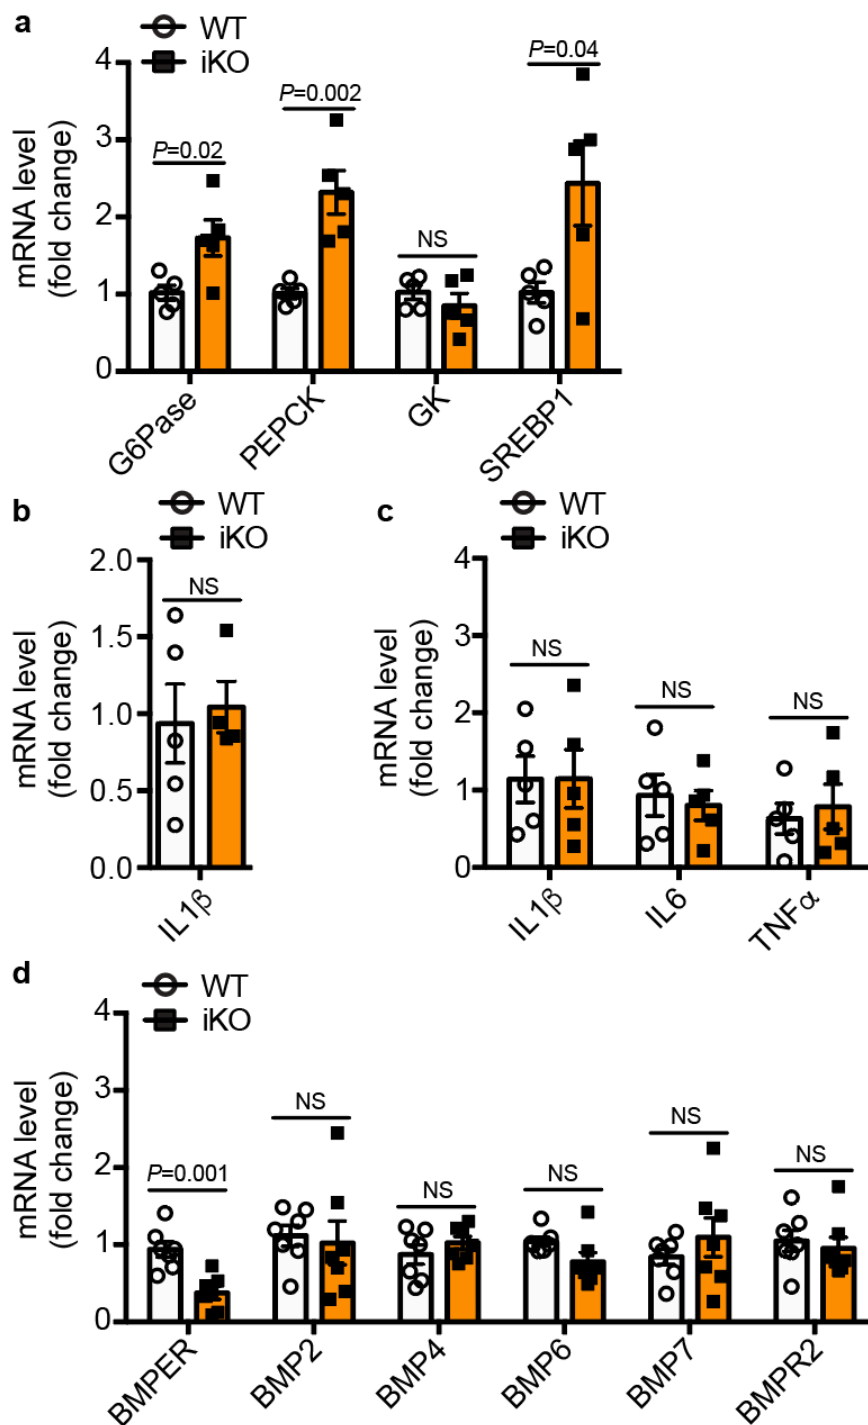

**Supplementary Figure 2. Gene expression changes in liver and WAT tissues of BMPER iKO mice.**

(a-d) Real-time PCR assays were performed for indicated genes in the liver (a, b, d) and WAT (c) of BMPER iKO and their littermate control (WT) mice.  $n=5$  (a, c), 5 (b, WT), 4 (b, iKO) and 7 (d). Data are presented as mean values  $\pm$  SEM. NS, not significant. Analysis was unpaired two-tailed Student's  $t$ -test.

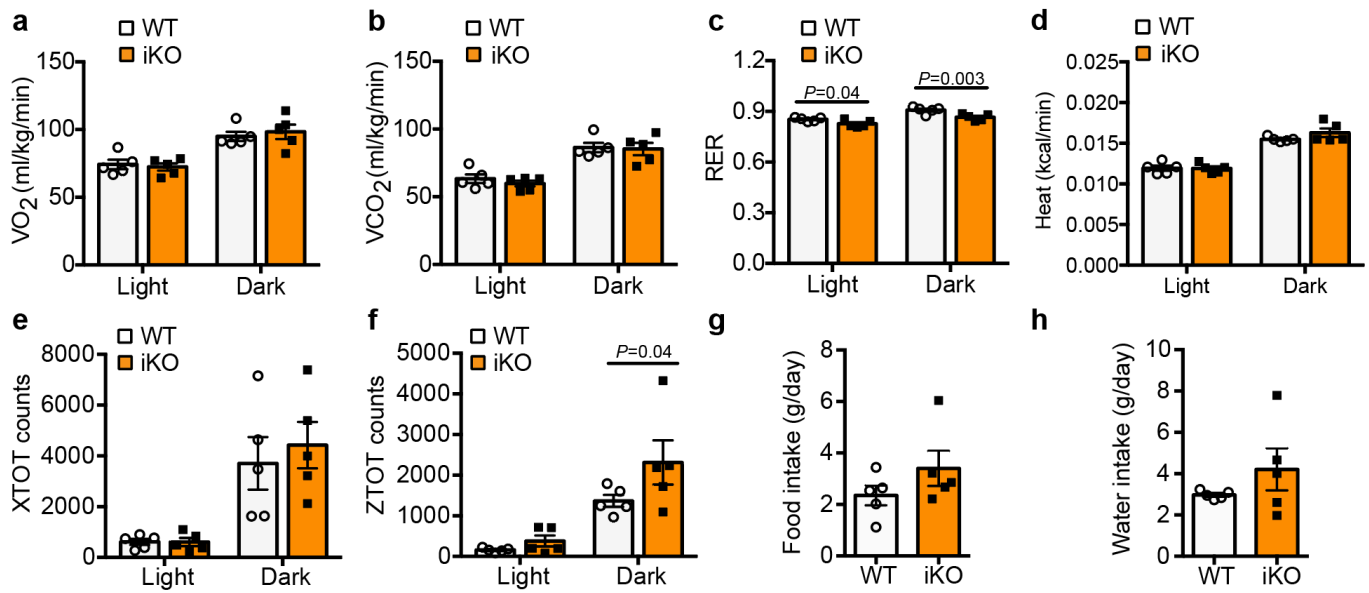

**Supplementary Figure 3. CLAMS studies with BMPER iKO mice.** Indirect calorimetry studies were performed to evaluate  $VO_2$  (a),  $VCO_2$  (b), respiratory exchange ratio (RER, c), heat (d), locomotor activity in x axis (XTOT, e) and z axis (ZTOT, f), daily food (g) and water intake (h).  $n=5$  mice (a-h). Data are presented as mean values  $\pm$  SEM. Analysis was two-way ANOVA followed by Fisher's LSD multiple comparison test (for a-f) and unpaired two-tailed Student's *t*-test (for g, h).

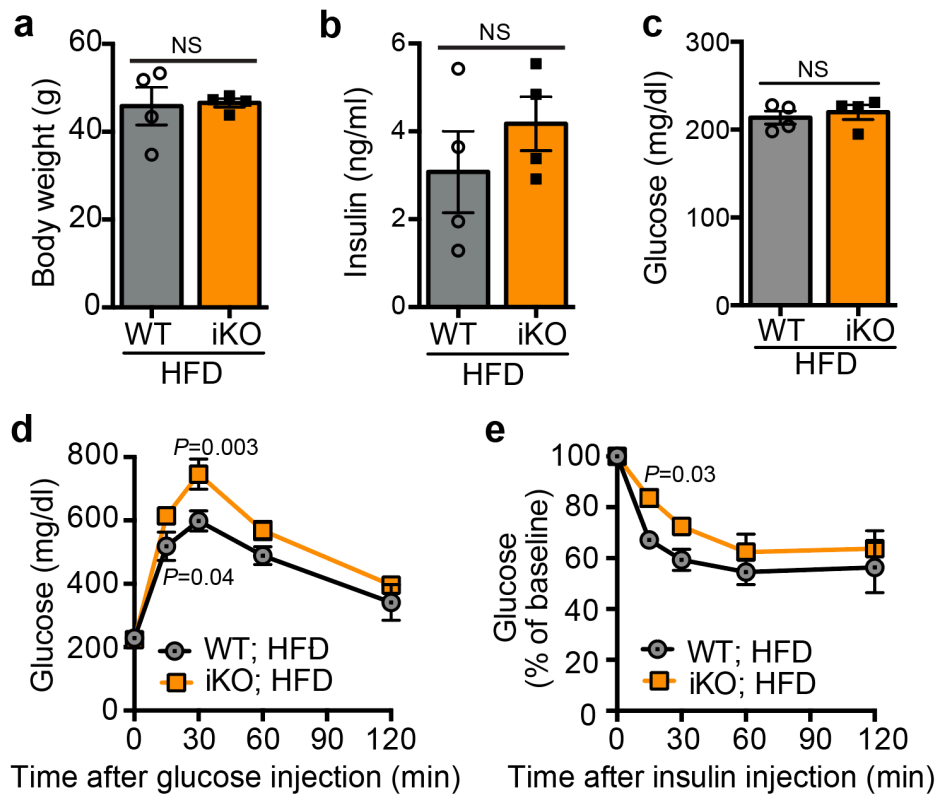

**Supplementary Figure 4. BMPER depletion exacerbates glucose responses in HFD-fed mice.** Metabolic studies were performed with BMPER iKO and WT mice following eight weeks of HFD feeding. **(a)** Body weight. **(b-c)** Fasted insulin and glucose. **(d-e)** Glucose and insulin tolerance tests. HFD, high-fat diet. n= 4 mice **(a-e)**. Data are presented as mean values  $\pm$  SEM. NS, not significant. Analysis was unpaired two-tailed Student's *t*-test (for **a-c**) and two-way ANOVA followed by Fisher's LSD multiple comparison test (for **d, e**).

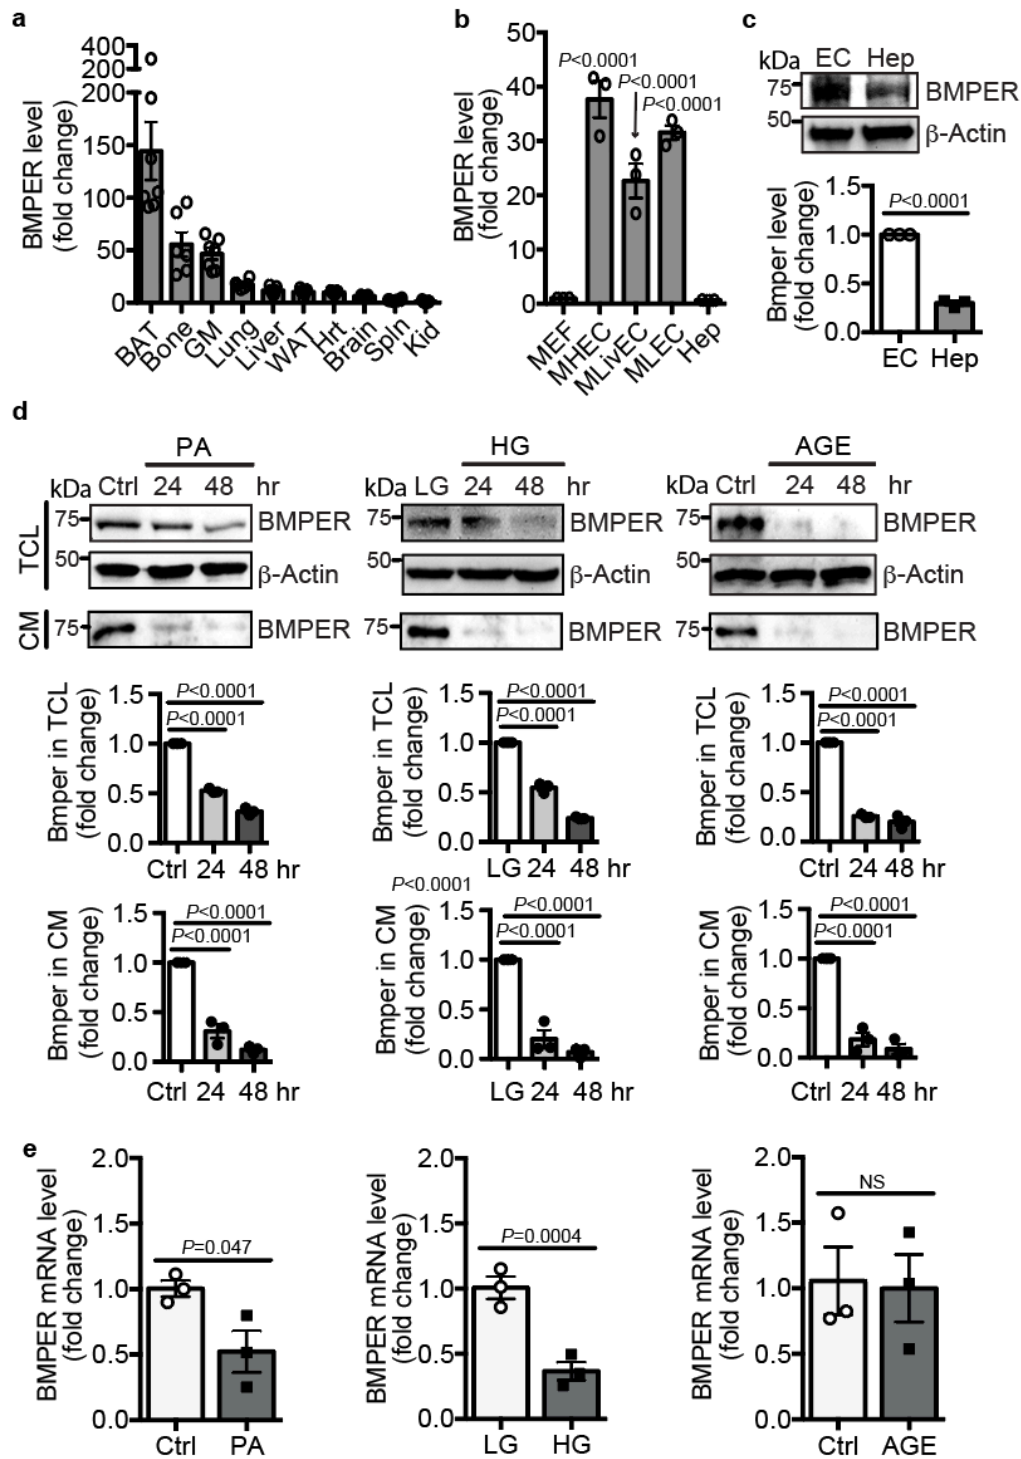

**Supplementary Figure 5. BMPER expression in ECs is downregulated by metabolic stress.** (a) BMPER mRNA levels in different tissues. BAT, brown adipose tissue. GM, gastrocnemius muscle. WAT, white adipose tissue. Hrt, heart. Spln, spleen. Kid, kidney. (b) BMPER mRNA levels in different primary cells. MEF, mouse embryonic fibroblast. MHEC, mouse heart EC. MLivEC, mouse liver EC. MLEC,

mouse lung EC. Hep, hepatocytes. **(c)** BMPER protein levels in EC and hepatocytes. Cell lysates of MLECs and hepatocytes were subjected for Western blotting assays. **(d-e)** BMPER protein level in EC total cell lysates (TCL) and conditioned medium (CM, **d**) and its mRNA (**e**) levels in ECs were decreased. MLivECs were treated with palmitic acids (PAs, 0.2 mM), high glucose (HG, 25 mM) or advanced glycation end products (AGEs, 100 ug/ml). LG, low glucose (5 mM supplemented with 20 mM mannitol as the osmotic control). BSA was used as the control (Ctrl) for PA and AGE treatments. TCL and CM were subjected for Western blotting or real time PCR assays. n=6 mice (**a**, bone, lung, spleen), 7 mice (**a**, other tissues), 3 experiments (**b-e**). Data are presented as mean values  $\pm$  SEM. NS, not significant. Analysis was one-way ANOVA followed by Fisher's LSD multiple comparison test (for **b**, **d**) or unpaired two-tailed Student's *t*-test (for **c**, **e**).

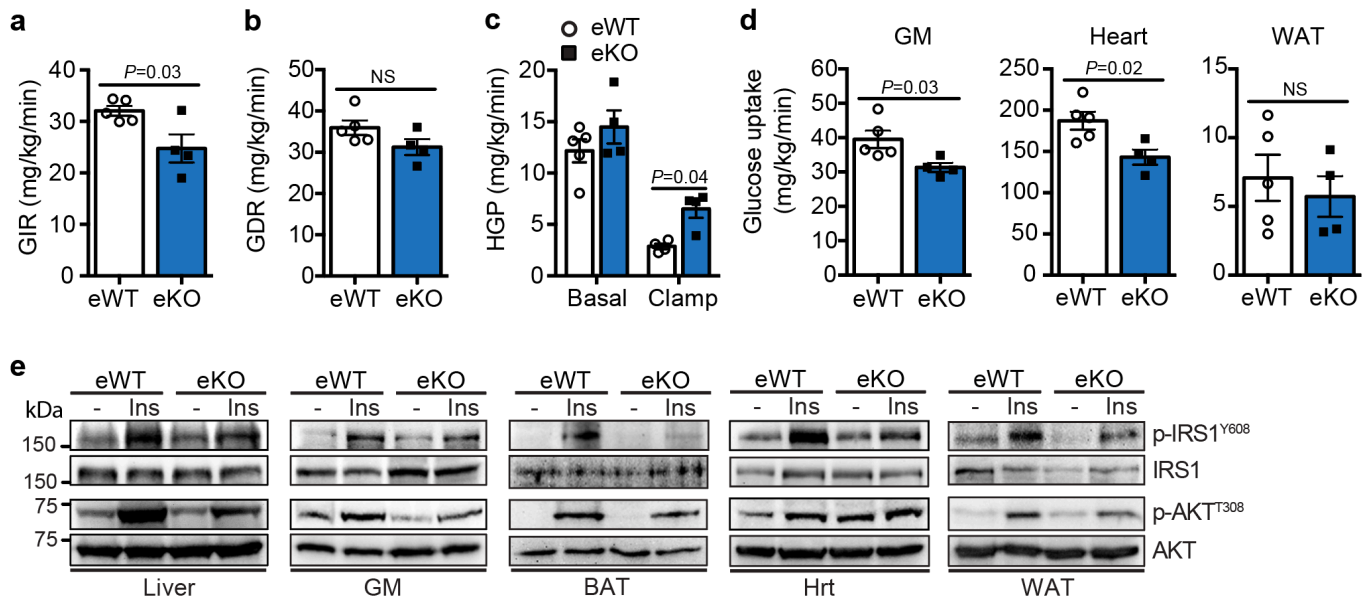

**Supplementary Figure 6. BMPER depletion in ECs leads to insulin resistance.** Clamp studies were performed with BMPER eKO and eWT mice at four months after tamoxifen injection. **(a)** Glucose infusion rate (GIR). **(b)** Glucose disposal rate (GDR). **(c-d)** Hepatic glucose production (HGP; **c**) and glucose uptake in peripheral tissues (**d**) were analyzed with hyperinsulinemic-euglycemic clamps. **(e)** Insulin signaling was blunted in BMPER eKO mice. Insulin (Ins, 0.5 hour) was injected (*i.p.*) into BMPER eKO and eWT mice. Indicated tissues were used for Western blotting. GM, gastrocnemius muscle; WAT, white adipose tissue. BAT, brown adipose tissue. Hrt, heart.  $n=5$  mice (**a-d**, eWT), 4 mice (**a-d**, eKO). Data are presented as mean values  $\pm$  SEM. NS, not significant. Analysis was unpaired two-tailed Student's *t*-test (for **a**, **b**, **d**) and two-way ANOVA followed by Fisher's LSD multiple comparison test (for **c**).

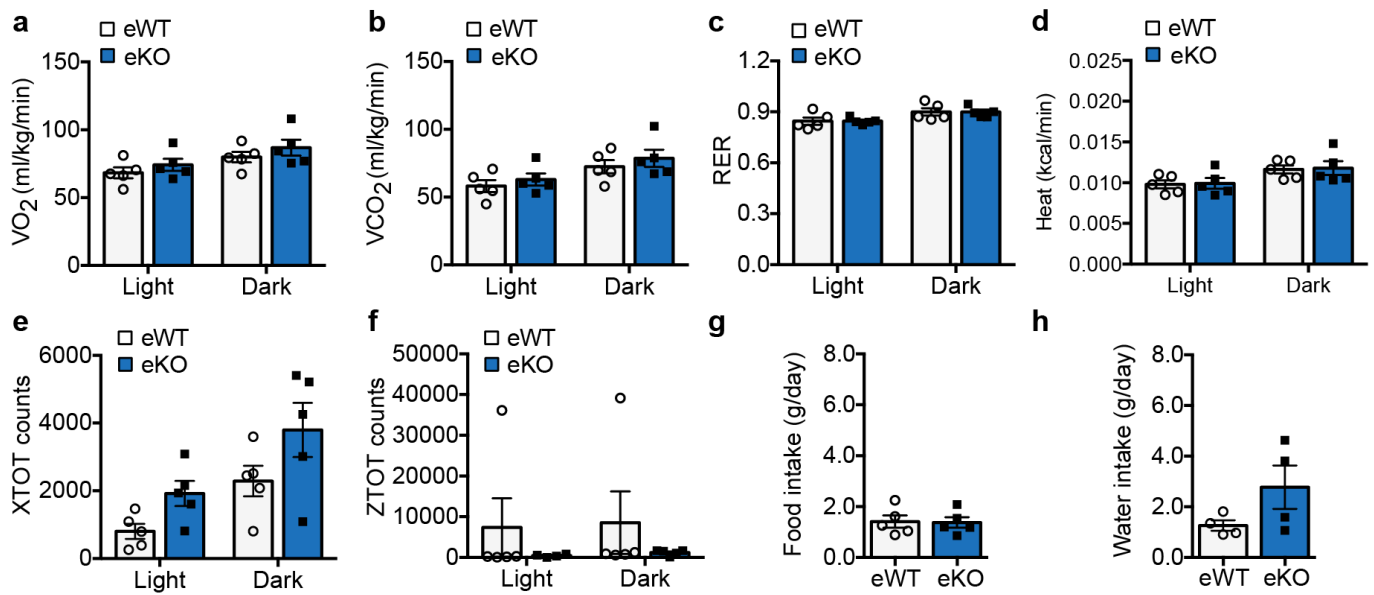

**Supplementary Figure 7. CLAMS studies with BMPER eKO mice.** Indirect calorimetry studies were performed to evaluate  $VO_2$  (a),  $VCO_2$  (b), respiratory exchange ratio (RER, c), heat (d), locomotor activity in x axis (XTOT, e) and z axis (ZTOT, f), daily food (g) and water intake (h).  $n=5$  mice (a-h). Data are presented as mean values  $\pm$  SEM. Analysis was two-way ANOVA followed by Fisher's LSD multiple comparison test (for a-f) and unpaired two-tailed Student's *t*-test (for g, h).

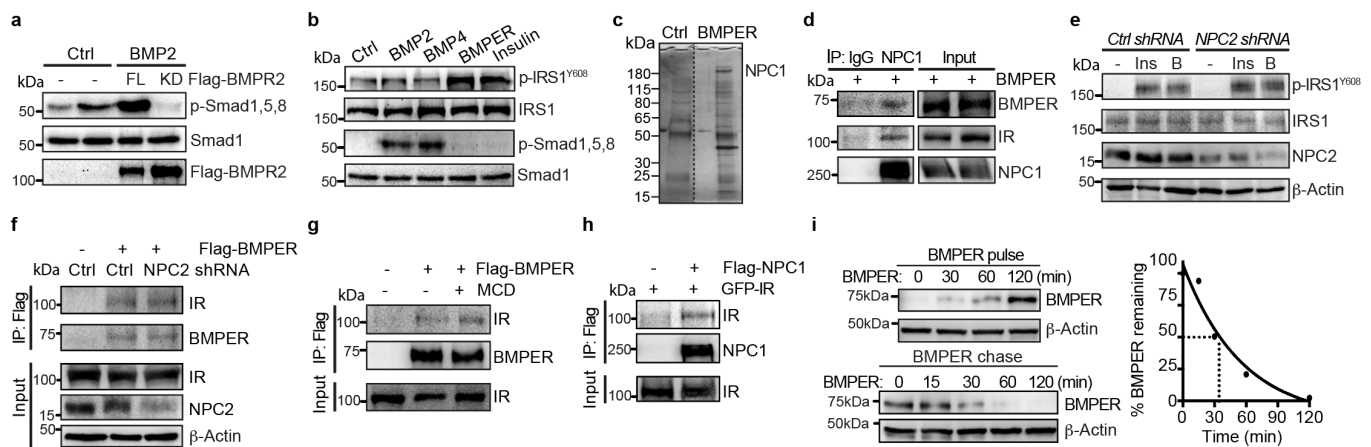

**Supplementary Figure 8. The regulation of BMPER-promoted insulin signaling pathway.** (a) Hepatocytes were transduced with adenovirus of flag-tagged BMPR2 full length (FL) or kinase-dead mutant (KD). Cells were then treated with BMP2 (4 nM, 1 hr). (b) Hepatocytes were treated with BMP2 (1 hr), BMP4 (1 hr), BMPER (1 hr) and insulin (30 min) and lysates were subjected for Western blotting assays. (c) NPC1 was identified in BMPER-bound complex in HEK293 cells. Cells were treated with BMPER (30 nM) and lysates were immunoprecipitated (IPed) with anti-BMPER antibody and stained with Coomassie blue. Selected bands were subjected for mass spectrometry analysis. (d) BMPER was identified in BMPER-bound complex in hepatocytes. Cells were treated with BMPER and lysates were IPed with anti-NPC1 antibody or IgG as the control. (e) Hepatocytes were transduced with *NPC2* shRNA lentivirus and then treated with BMPER (B, 1 hr) or insulin (Ins, 30 min). Cell lysates were subjected for Western blotting assays. (f-g) Hepatocytes were transduced with *NPC2* shRNA lentivirus (f) or pretreated with methyl- $\beta$ -cyclodextrin (MCD, 10 mM, 30 min, g) and then treated with flag-tagged BMPER. Cell lysates were subjected for IP for BMPER-interacting proteins. (h) Co-IP of Flag-tagged NPC1 and GFP-tagged IR in HEK293 cells. (i) Hepatocytes were pulsed with Flag-BMPER (100 nM, 7.2 ng) for indicated time periods (left top panel), and then chased at 4°C (left bottom panel). Right panel is graphic representation of normalized intracellular BMPER level from the cold chase. n=3 experiments (i).



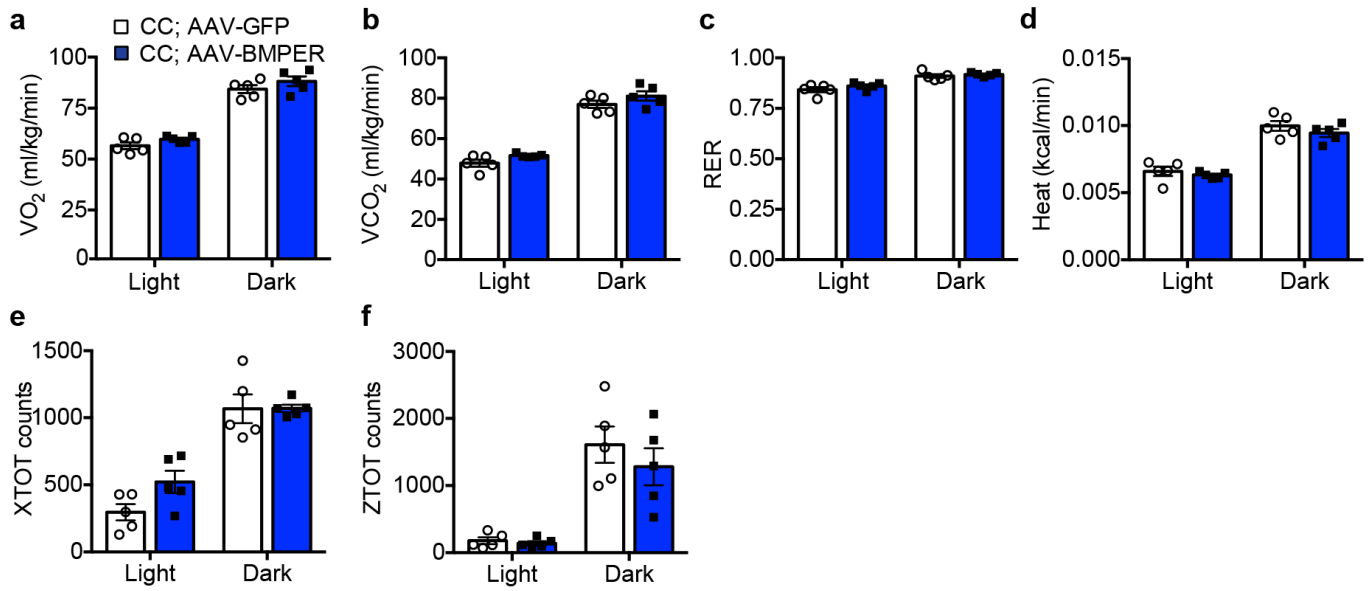

**Supplementary Figure 9. CLAMS studies with AAV-BMPER injected mice following control chow-feeding.** Indirect calorimetry studies were performed to evaluate  $VO_2$  (a),  $VCO_2$  (b), respiratory exchange ratio (RER, c), heat (d), locomotor activity in x axis (XTOT, e) and z axis (ZTOT, f). n=5 mice (a-f). Data are presented as mean values  $\pm$  SEM. Analysis was two-way ANOVA followed by Fisher's LSD multiple comparison test.

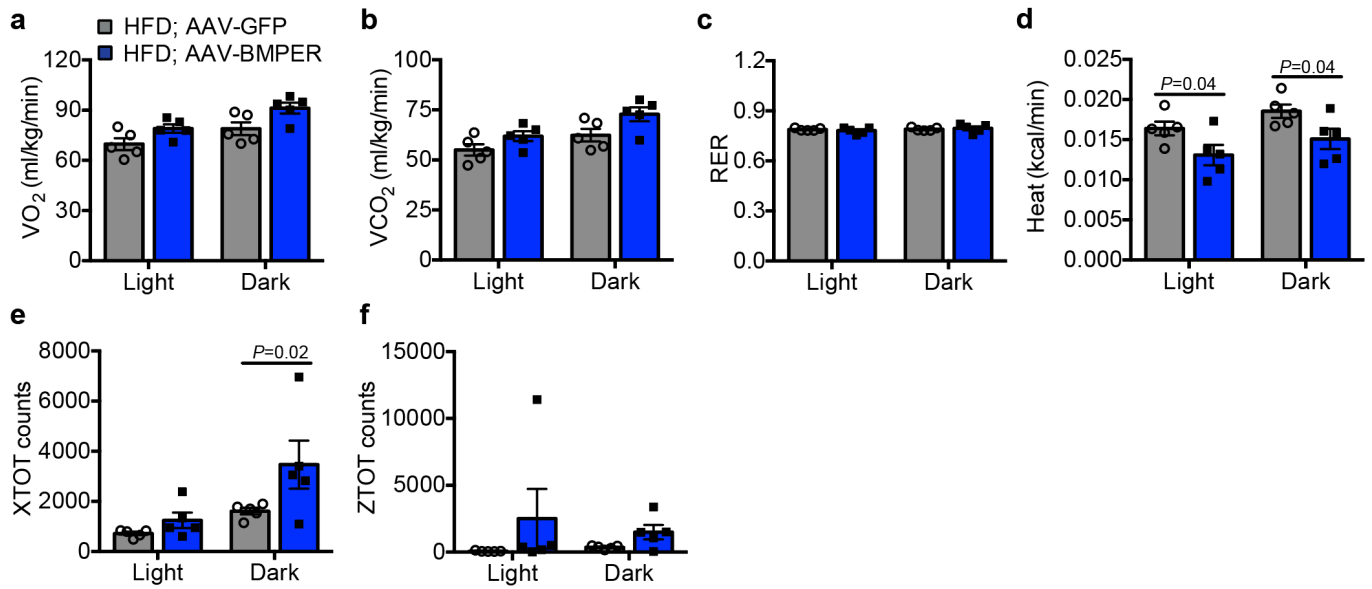

**Supplementary Figure 10. CLAMS studies with AAV-BMPER injected mice following HFD feeding.**

Indirect calorimetry studies were performed to evaluate  $VO_2$  (a),  $VCO_2$  (b), respiratory exchange ratio (RER, c), heat (d), locomotor activity in x axis (XTOT, e) and z axis (ZTOT, f). n=5 mice (a-f). Data are presented as mean values  $\pm$  SEM. Analysis was two-way ANOVA followed by Fisher's LSD multiple comparison test.

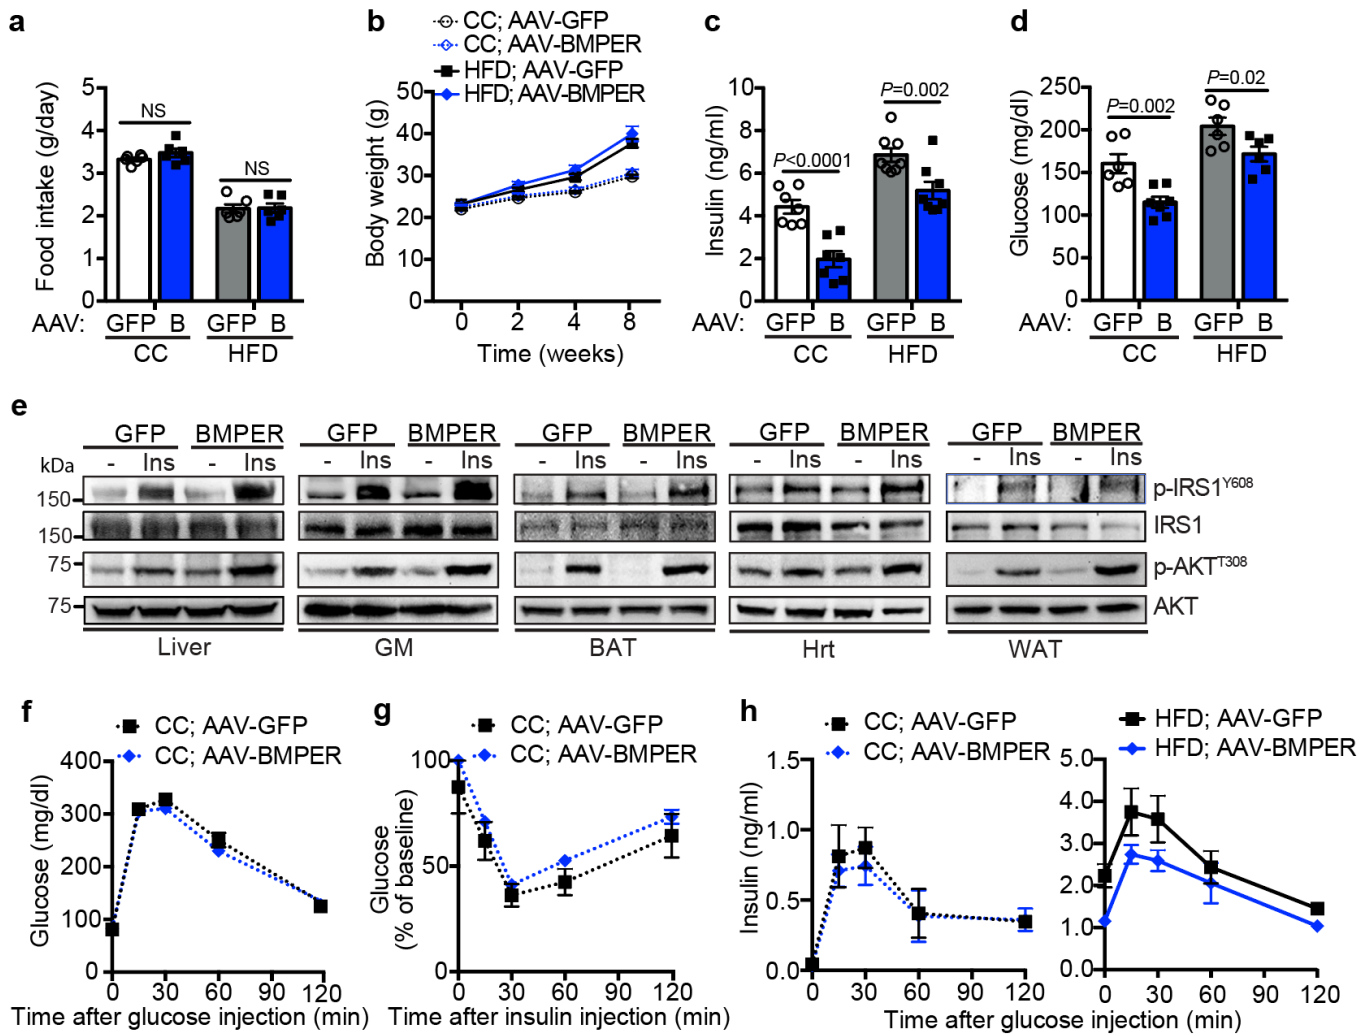

**Supplementary Figure 11. AAV-BMPER improves glucose responses in DIO mice.** AAV-BMPER or AAV-GFP was injected into C57BL/6 mice and then fed them HFD for eight weeks. **(a)** Food intake in AAV-GFP or AAV-BMPER (B) injected mice that were fed HFD or CC diet. **(b)** Body weight. **(c-d)** Fed insulin and glucose. **(e)** Insulin signaling was enhanced in AAV-BMPER-injected mice. Insulin (Ins, 0.5 hour) was injected (*i.p.*) into AAV-BMPER and GFP-injected mice. Indicated tissues were used for Western blotting. **(f-g)** Glucose and insulin tolerance tests. **(h)** Insulin levels during glucose tolerance tests.  $n=6$  mice **(a)**, 7-8 mice **(b)**, 7 mice **(c, CC)**, 8 mice **(c, HFD)**, 6-7 mice **(d, CC)**, 6 mice **(d, HFD)**, 7 mice **(f-g, AAV-GFP)**, 8 mice **(f-g, AAV-BMPER)** and 5 mice **(h)**. Data are presented as mean values  $\pm$  SEM. NS, not significant. Analysis was two-way ANOVA followed by Fisher's LSD multiple comparison test.

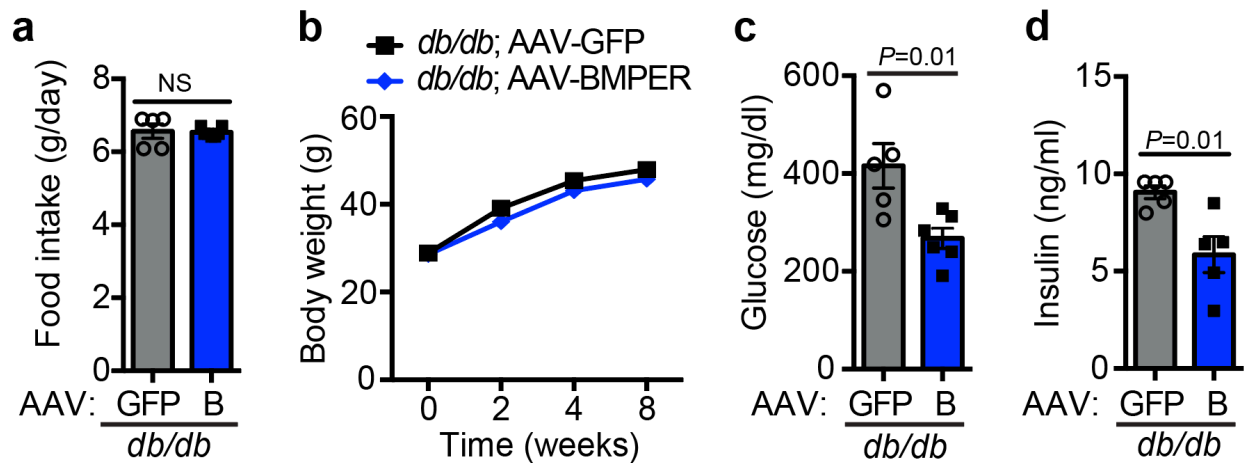

**Supplementary Figure 12. AAV-BMPER improves glucose responses in *db/db* mice.** AAV-BMPER or AAV-GFP was injected into 5-week-old *db/db* mice and then monitored for eight weeks. **(a)** Food intake in AAV-GFP or AAV-BMPER (B)- injected *db/db* mice. **(b)** Body weight. **(c-d)** Fed insulin and glucose. n=5 mice **(a, b, c, AAV-GFP)**, 7 mice **(a, b, AAV-BMPER)**, 6 mice **(c, AAV-BMPER)** and 5 mice **(d)**. Data are presented as mean values  $\pm$  SEM. NS, not significant. Analysis was unpaired two-tailed Student's *t*-test (for **a, c, d**) or two-way ANOVA followed by Fisher's LSD multiple comparison test (for **b**).
