# Supplementary material for: Loss of bone morphogenetic protein-binding endothelial regulator causes insulin resistance
Source: PubMed Central journal article supplement (PMC7997910; doi:10.1038/s41467-021-22130-2), 2021-03-26
Supplement: 41467_2021_22130_MOESM3_ESM.pdf [file 41467_2021_22130_MOESM3_ESM.pdf]

## Reporting Summary

Nature Research wishes to improve the reproducibility of the work that we publish. This form provides structure for consistency and transparency in reporting. For further information on Nature Research policies, see [Authors & Referees](#) and the [Editorial Policy Checklist](#).

### Statistics

For all statistical analyses, confirm that the following items are present in the figure legend, table legend, main text, or Methods section.

- | n/a                                 | Confirmed                                                                                                                                                                                                                                                                                      |
|-------------------------------------|------------------------------------------------------------------------------------------------------------------------------------------------------------------------------------------------------------------------------------------------------------------------------------------------|
| <input type="checkbox"/>            | <input checked="" type="checkbox"/> The exact sample size ( $n$ ) for each experimental group/condition, given as a discrete number and unit of measurement                                                                                                                                    |
| <input type="checkbox"/>            | <input checked="" type="checkbox"/> A statement on whether measurements were taken from distinct samples or whether the same sample was measured repeatedly                                                                                                                                    |
| <input type="checkbox"/>            | <input checked="" type="checkbox"/> The statistical test(s) used AND whether they are one- or two-sided<br><i>Only common tests should be described solely by name; describe more complex techniques in the Methods section.</i>                                                               |
| <input type="checkbox"/>            | <input checked="" type="checkbox"/> A description of all covariates tested                                                                                                                                                                                                                     |
| <input type="checkbox"/>            | <input checked="" type="checkbox"/> A description of any assumptions or corrections, such as tests of normality and adjustment for multiple comparisons                                                                                                                                        |
| <input type="checkbox"/>            | <input checked="" type="checkbox"/> A full description of the statistical parameters including central tendency (e.g. means) or other basic estimates (e.g. regression coefficient) AND variation (e.g. standard deviation) or associated estimates of uncertainty (e.g. confidence intervals) |
| <input type="checkbox"/>            | <input checked="" type="checkbox"/> For null hypothesis testing, the test statistic (e.g. $F$ , $t$ , $r$ ) with confidence intervals, effect sizes, degrees of freedom and $P$ value noted<br><i>Give <math>P</math> values as exact values whenever suitable.</i>                            |
| <input checked="" type="checkbox"/> | <input type="checkbox"/> For Bayesian analysis, information on the choice of priors and Markov chain Monte Carlo settings                                                                                                                                                                      |
| <input checked="" type="checkbox"/> | <input type="checkbox"/> For hierarchical and complex designs, identification of the appropriate level for tests and full reporting of outcomes                                                                                                                                                |
| <input type="checkbox"/>            | <input checked="" type="checkbox"/> Estimates of effect sizes (e.g. Cohen's $d$ , Pearson's $r$ ), indicating how they were calculated                                                                                                                                                         |

*Our web collection on [statistics for biologists](#) contains articles on many of the points above.*

### Software and code

Policy information about [availability of computer code](#)

- Data collection
- Data analysis

For manuscripts utilizing custom algorithms or software that are central to the research but not yet described in published literature, software must be made available to editors/reviewers. We strongly encourage code deposition in a community repository (e.g. GitHub). See the Nature Research [guidelines for submitting code & software](#) for further information.

### Data

Policy information about [availability of data](#)

All manuscripts must include a [data availability statement](#). This statement should provide the following information, where applicable:

- Accession codes, unique identifiers, or web links for publicly available datasets
- A list of figures that have associated raw data
- A description of any restrictions on data availability

## Field-specific reporting

Please select the one below that is the best fit for your research. If you are not sure, read the appropriate sections before making your selection.

- Life sciences       Behavioural & social sciences       Ecological, evolutionary & environmental sciences

For a reference copy of the document with all sections, see [nature.com/documents/nr-reporting-summary-flat.pdf](https://www.nature.com/documents/nr-reporting-summary-flat.pdf)

## Life sciences study design

All studies must disclose on these points even when the disclosure is negative.

|                 |                                                                                                                                                                                                                        |
|-----------------|------------------------------------------------------------------------------------------------------------------------------------------------------------------------------------------------------------------------|
| Sample size     | No statistical methods were used to predetermine the sample size.                                                                                                                                                      |
| Data exclusions | Using GraphPad Prism software, individual technical replicates were excluded from qPCR analysis if they were calculated to be outliers by the "identify outliers" function. No other data were excluded from analyses. |
| Replication     | All data presented in this study are representative results of at least three independent experiments.                                                                                                                 |
| Randomization   | Samples and animal subjects were allocated randomly.                                                                                                                                                                   |
| Blinding        | Data acquisition was performed in a blinded fashion.                                                                                                                                                                   |

## Reporting for specific materials, systems and methods

We require information from authors about some types of materials, experimental systems and methods used in many studies. Here, indicate whether each material, system or method listed is relevant to your study. If you are not sure if a list item applies to your research, read the appropriate section before selecting a response.

### Materials & experimental systems

| n/a                                 | Involvement in the study                                        |
|-------------------------------------|-----------------------------------------------------------------|
| <input type="checkbox"/>            | <input checked="" type="checkbox"/> Antibodies                  |
| <input type="checkbox"/>            | <input checked="" type="checkbox"/> Eukaryotic cell lines       |
| <input checked="" type="checkbox"/> | <input type="checkbox"/> Palaeontology                          |
| <input type="checkbox"/>            | <input checked="" type="checkbox"/> Animals and other organisms |
| <input type="checkbox"/>            | <input checked="" type="checkbox"/> Human research participants |
| <input checked="" type="checkbox"/> | <input type="checkbox"/> Clinical data                          |

### Methods

| n/a                                 | Involvement in the study                        |
|-------------------------------------|-------------------------------------------------|
| <input checked="" type="checkbox"/> | <input type="checkbox"/> ChIP-seq               |
| <input checked="" type="checkbox"/> | <input type="checkbox"/> Flow cytometry         |
| <input checked="" type="checkbox"/> | <input type="checkbox"/> MRI-based neuroimaging |

## Antibodies

|                 |                                                                                                                                                                                                                                                     |
|-----------------|-----------------------------------------------------------------------------------------------------------------------------------------------------------------------------------------------------------------------------------------------------|
| Antibodies used | Information for antibodies is provided in the Supplementary Table 3.                                                                                                                                                                                |
| Validation      | Validation information for BMPER and NPC1 is provided in this manuscript (Fig. 1b for BMPER, Fig. 4c for NPC1). Other antibodies, including that for IRS1, IR, Smad1, 5, 8, AKT and beta-actin, have been validated in the manufacturer's websites. |

## Eukaryotic cell lines

Policy information about [cell lines](#)

|                                                                   |                                                                                                                                                                                                                                                                |
|-------------------------------------------------------------------|----------------------------------------------------------------------------------------------------------------------------------------------------------------------------------------------------------------------------------------------------------------|
| Cell line source(s)                                               | Information for cell line is provided in the Supplementary Table 3.                                                                                                                                                                                            |
| Authentication                                                    | The isolated mouse primary hepatocytes were subjected for real-time PCR assays (i.e. transthyretin, CD45, collagen I and Tie2). The high level of transthyretin but very low level of CD45, collagen I and Tie2 would suggest the highly enriched hepatocytes. |
| Mycoplasma contamination                                          | All cell lines were tested as mycoplasma negative.                                                                                                                                                                                                             |
| Commonly misidentified lines (See <a href="#">ICLAC</a> register) | n/a.                                                                                                                                                                                                                                                           |

## Animals and other organisms

Policy information about [studies involving animals](#); [ARRIVE guidelines](#) recommended for reporting animal research

|                         |                                                                                                                                                                                                                                                                                                                                                  |
|-------------------------|--------------------------------------------------------------------------------------------------------------------------------------------------------------------------------------------------------------------------------------------------------------------------------------------------------------------------------------------------|
| Laboratory animals      | We used BMPERflox/flox; CAG-CreER+/- (WT or iKO), BMPERflox/flox; Cdh5-CreER+/- (eWT or eKO), IRflox/flox; CAG-CreER+/- and db/db male mice at 2-5 months old for diabetes studies. C57BL/6J male mice at 6-8 weeks old were used for hepatocyte isolation and insulin signaling experiments. Their sources are listed in Supplementary Table 3. |
| Wild animals            | n/a.                                                                                                                                                                                                                                                                                                                                             |
| Field-collected samples | n/a.                                                                                                                                                                                                                                                                                                                                             |

## Ethics oversight

All experimental procedures on mice were performed according to the National Institutes of Health Guide for the Care and Use of Laboratory Animals and approved by the Institutional Committee for the Use of Animals in Research at Baylor College of Medicine. Plasma samples were obtained from the study (Khan IM et al. J. Clin. Endocrinol. Metab. 2016) that was approved by the Institutional Review Board of Baylor College of Medicine.

Note that full information on the approval of the study protocol must also be provided in the manuscript.

## Human research participants

Policy information about [studies involving human research participants](#)

## Population characteristics

Subjects with metabolic syndrome (MS) were identified by the Adult Treatment Panel III criteria (27): at least 3 of the following were present: 1) high-density lipoprotein cholesterol (HDL-C) below 40 mg/dl for men and below 50 mg/dl for women; 2) glucose of at least 100 mg/dl; 3) triglycerides of at least 150 mg/dl; 4) blood pressure (BP) of at least 130/85 mm Hg; 5) waist circumference more than 102 cm in men and more than 88 cm in women. Individuals with BMI 18.5–27.4 kg/m<sup>2</sup> and fasting triglycerides lower than 150 mg/dl were used as normal controls.

## Recruitment

Male and female volunteers were recruited at the Center for Cardiovascular Disease Prevention at Baylor College of Medicine, Houston, Texas, or by advertisement. 11 Subjects with metabolic syndrome and 11 healthy individuals were recruited. Individuals were excluded if they were younger than 18 years of age, pregnant, or breastfeeding, or had acute illnesses, chronic liver or renal disease, cancer, bone fractures, diabetes, endocrinologic causes of obesity, obvious inflammation, or a history of myocardial infarction within the past 6 months or any hospitalization within the previous 2 months. Informed consent was obtained from all subjects.

## Ethics oversight

The clinical study was approved by the Institutional Review Board for Baylor College of Medicine and Affiliated Hospitals. It is not a clinical trial and not prospectively registered.

Note that full information on the approval of the study protocol must also be provided in the manuscript.
